# Supplementary material for: DNAJA1 Stabilizes EF1A1 to Promote Cell Proliferation and Metastasis of Liver Cancer Mediated by miR-205-5p
Source: J Oncol. 2022 May 9;2022:2292481. doi: 10.1155/2022/2292481 (PMC9110222; doi:10.1155/2022/2292481)
Supplement: Supplementary Materials — Other experimental methods and data are shown in Supplemental materials. [file 2292481.f1.zip]

Archive with 2 entries (2 files):
- Supplementary file (2).docx
- Supplementary Tables.docx
